# Supplementary material for: Anserine, a Histidine-Containing Dipeptide, Suppresses Pressure Overload-Induced Systolic Dysfunction by Inhibiting Histone Acetyltransferase Activity of p300 in Mice
Source: MDPI journal article supplement (doi:10.3390/ijms25042344), 2024-02-16
Supplement: s1 [file s1]

# Supplemental Figure S1

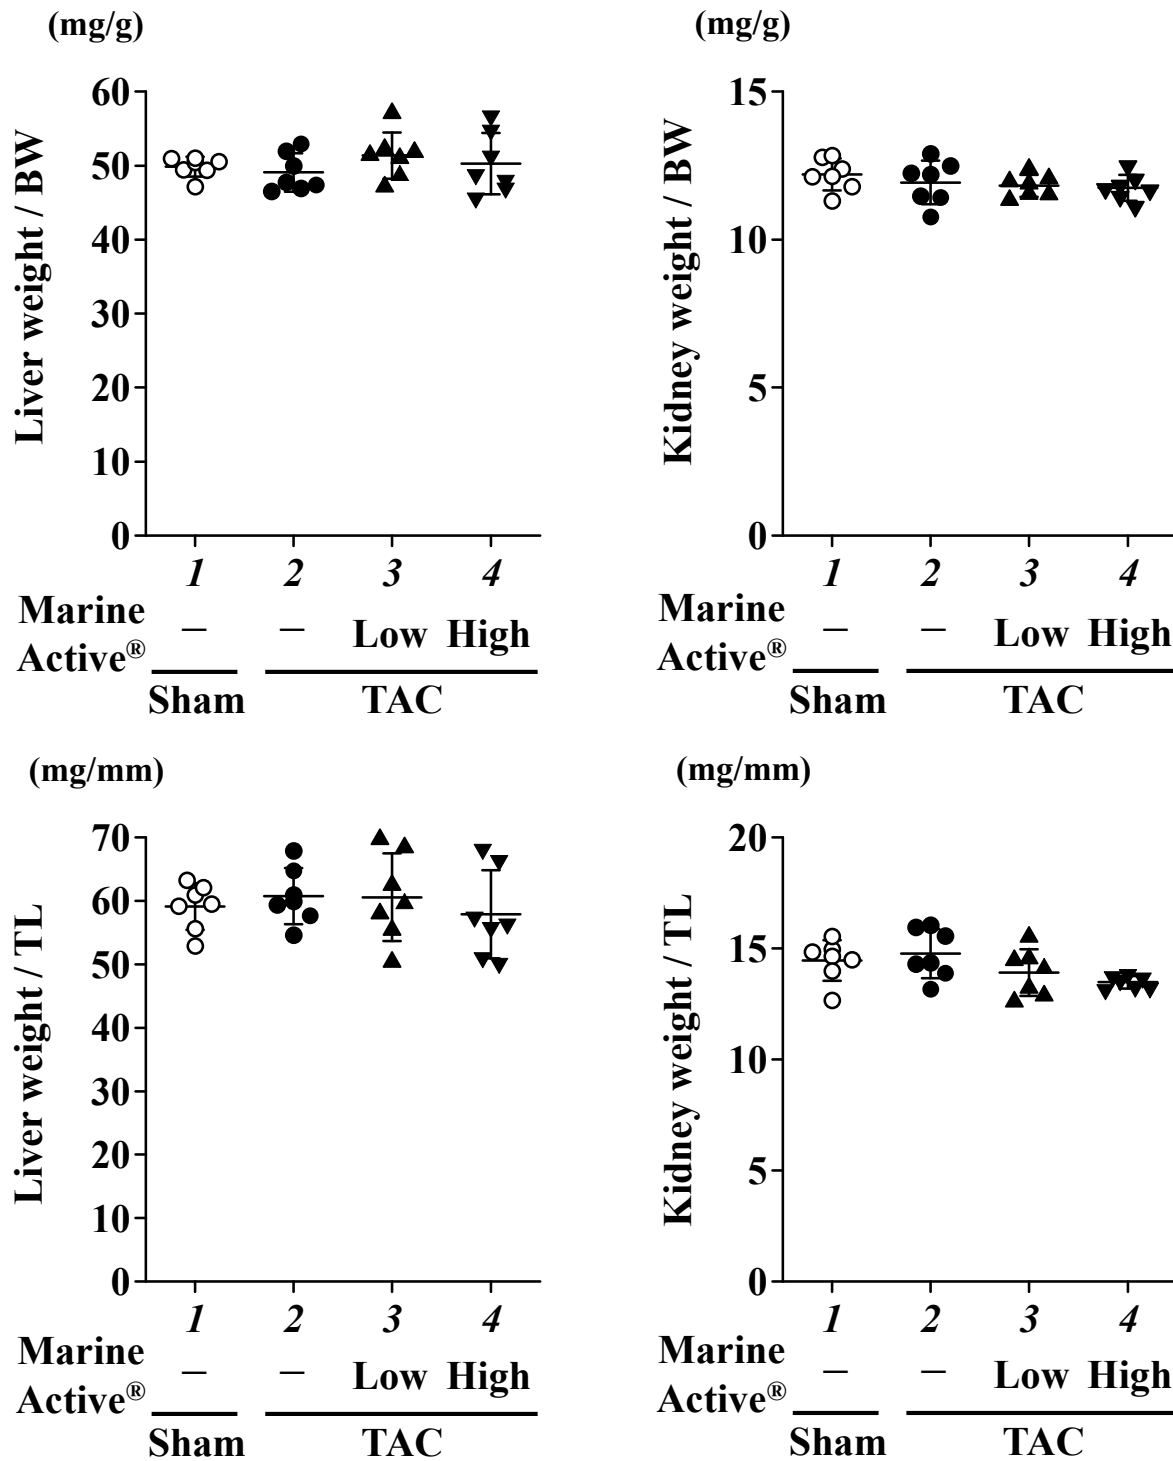

**Supplemental Figure S1 Liver and kidney weights to BW or TL ratios at 8 weeks after TAC operation**

(A-D) The ratio of liver weight-to-BW (A), kidney weight-to-BW (B), liver weight-to-TL (C), and kidney weight-to-TL (D) are presented as dot plots. Data are presented as the means  $\pm$  SD (n=7).

## Supplemental Figure S2

**A**

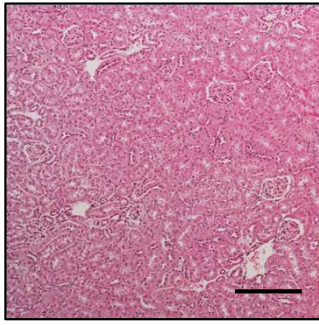

**Sham + Vehicle**

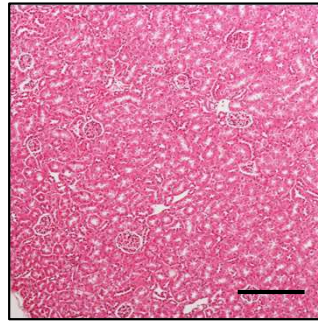

**TAC + Vehicle**

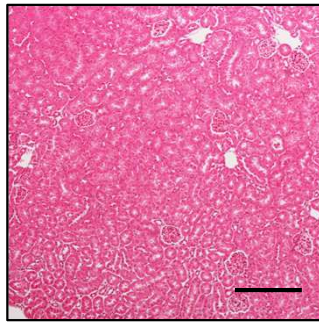

**TAC + Low dose  
Marine Active<sup>®</sup>**

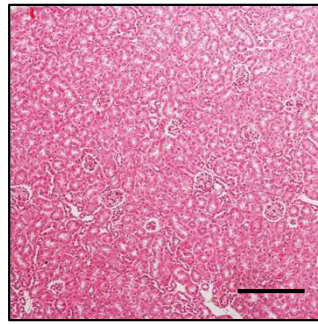

**TAC + High dose  
Marine Active<sup>®</sup>**

**B**

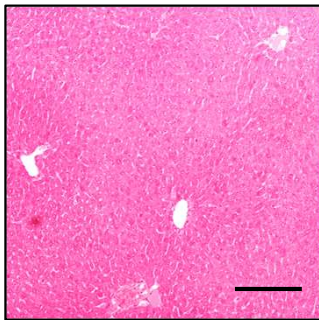

**Sham + Vehicle**

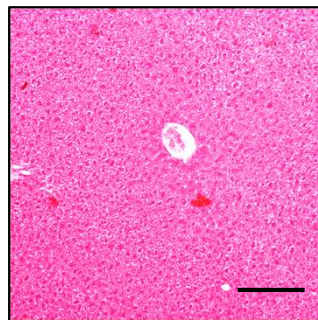

**TAC + Vehicle**

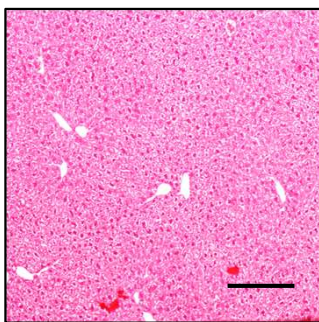

**TAC + Low dose  
Marine Active<sup>®</sup>**

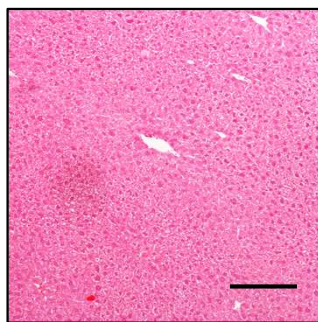

**TAC + High dose  
Marine Active<sup>®</sup>**

**Supplemental Figure S2 Microscopic photographs of liver and kidney tissues.**

(A and B) Representative microscopic images of liver (A) and kidney (B) with HE staining were visualized by light microscopy. Scale bar: 200  $\mu$ m.
